# Supplementary material for: Degradation of lignin β‐aryl ether units in Arabidopsis thaliana expressing LigD, LigF and LigG from Sphingomonas paucimobilis SYK‐6
Source: PubMed Central journal article supplement (PMC5399005; doi:10.1111/pbi.12655), 2016-11-29

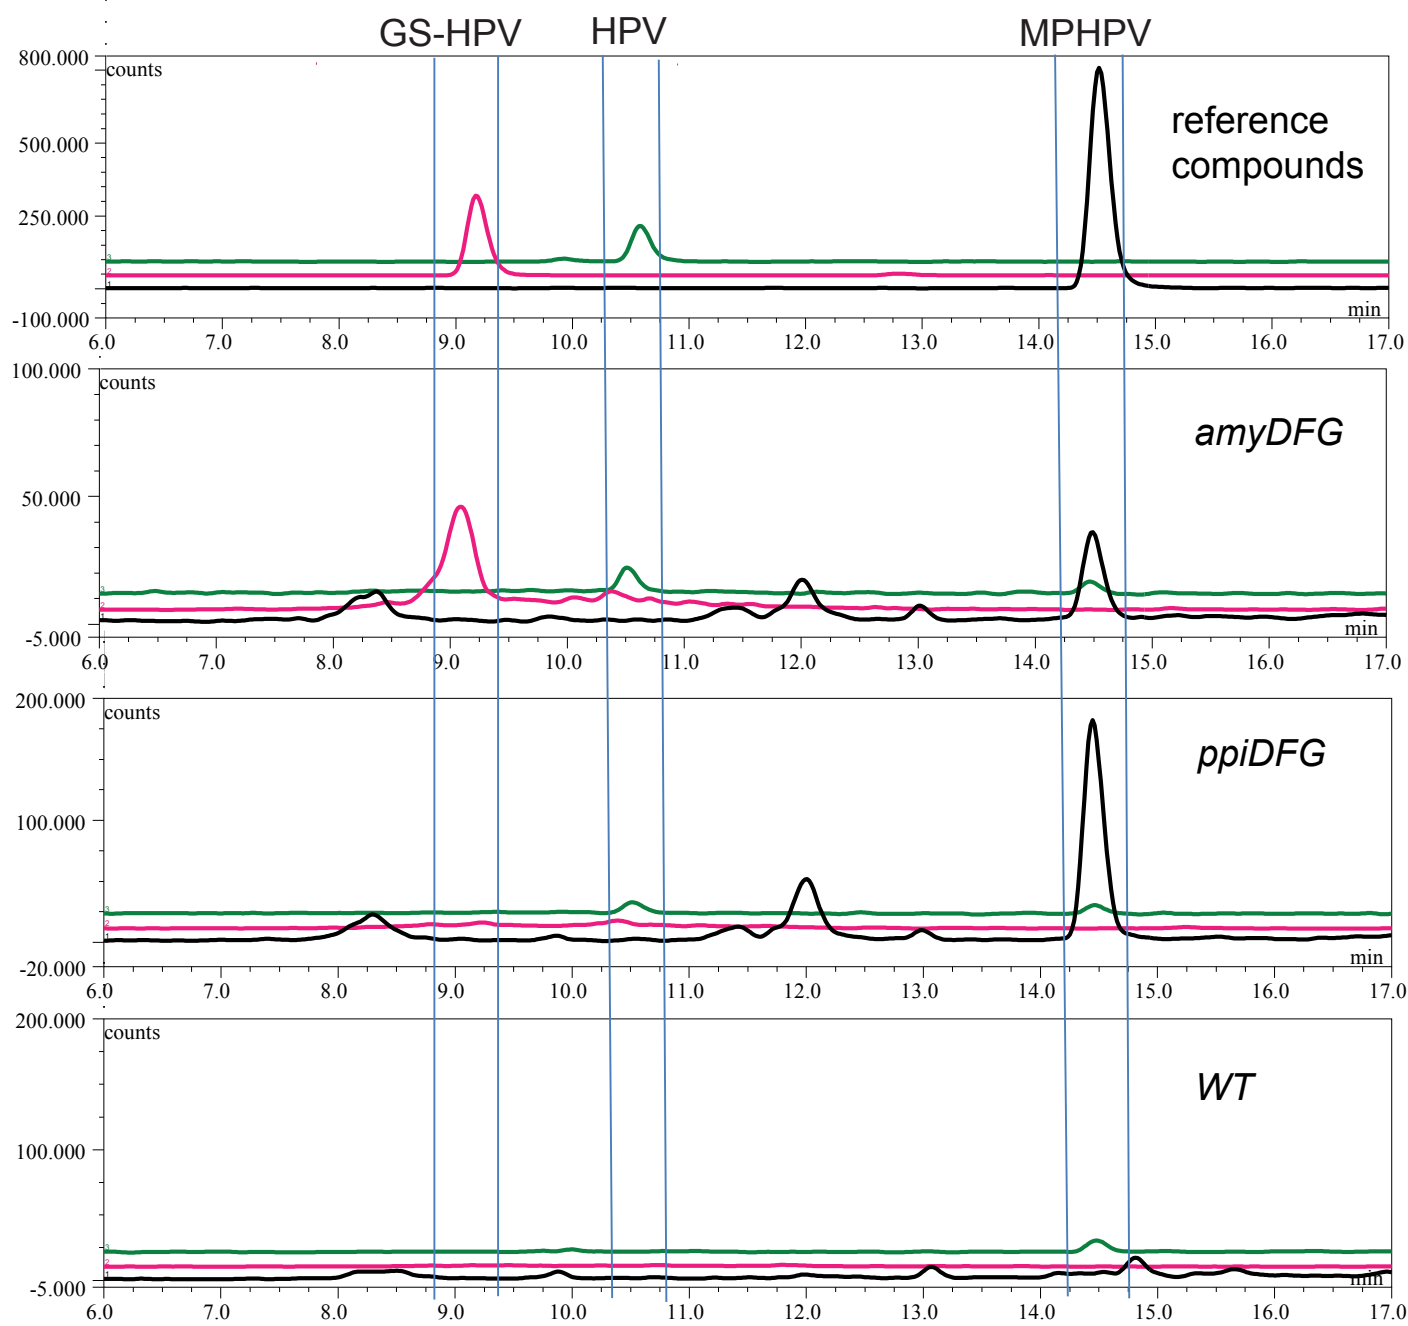

Supplement: PBI-15-581-s001.pdf [file PBI-15-581-s001.pdf]
