# Supplementary material for: Degradation of lignin β‐aryl ether units in Arabidopsis thaliana expressing LigD, LigF and LigG from Sphingomonas paucimobilis SYK‐6
Source: PubMed Central journal article supplement (PMC5399005; doi:10.1111/pbi.12655), 2016-11-29

## 1 HPV $\gamma$ -O-hexoside ( $m/z$ 357.1194, 4.50 min)

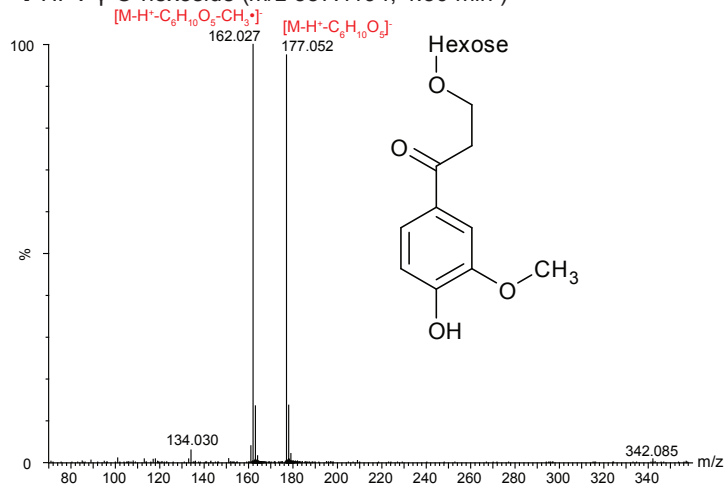

## Standard HPV $\gamma$ -O-hexoside ( $m/z$ 357.1208, 4.51 min)

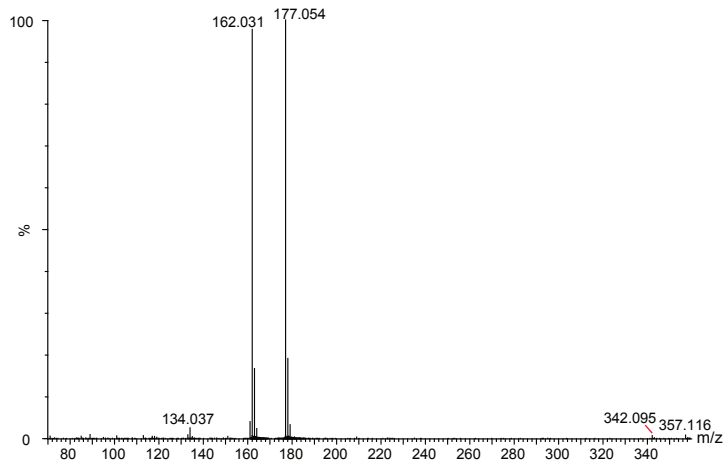

## 2 HPS $\gamma$ -O-hexoside ( $m/z$ 387.1342, 5.01 min)

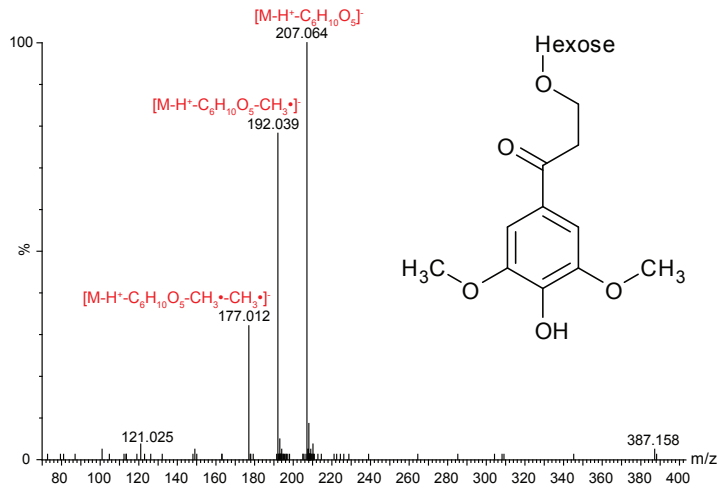

## 3 HPV $\gamma$ -O-acetyl hexose ( $m/z$ 399.1570, 6.45 min)

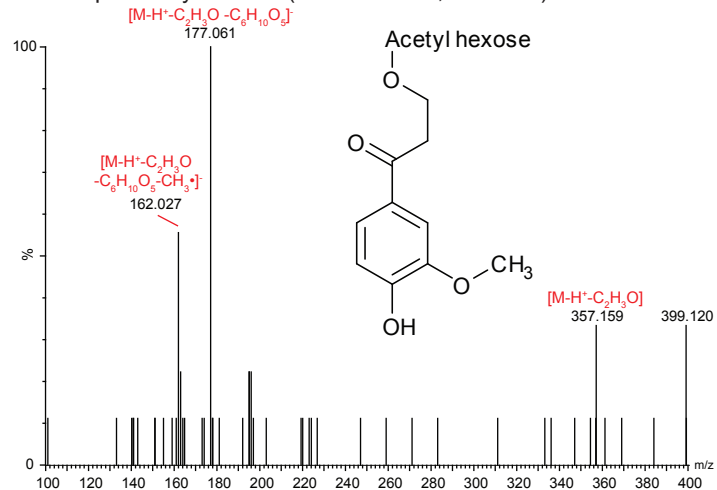

Supplement: PBI-15-581-s003.pdf [file PBI-15-581-s003.pdf]
