# Supplementary material for: Degradation of lignin β‐aryl ether units in Arabidopsis thaliana expressing LigD, LigF and LigG from Sphingomonas paucimobilis SYK‐6
Source: PubMed Central journal article supplement (PMC5399005; doi:10.1111/pbi.12655), 2016-11-29

### HPV $\gamma$ -O-hexoside

ANOVA p-value:  $6.0 \times 10^{-5}$

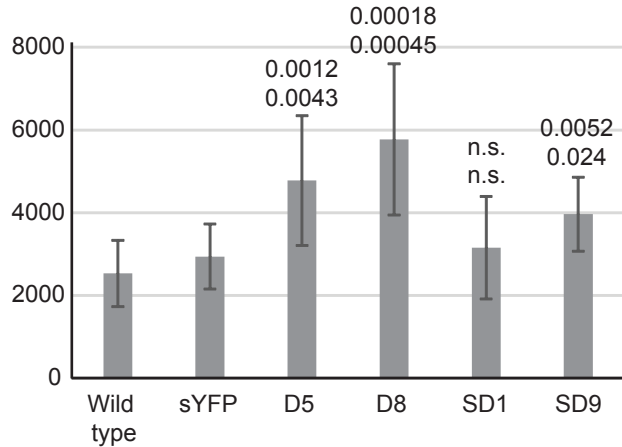

### HPS $\gamma$ -O-hexoside

ANOVA p-value:  $1.1 \times 10^{-5}$

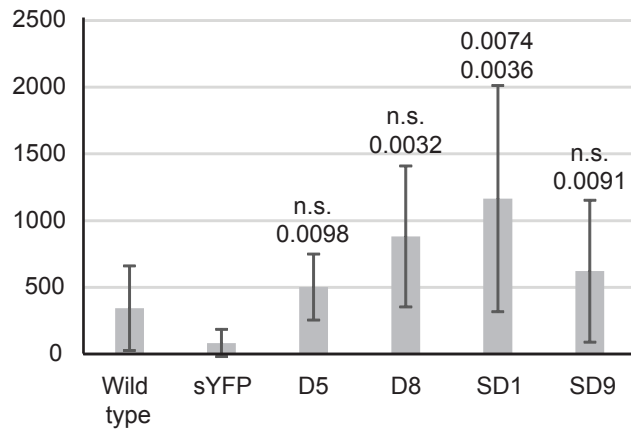

### HPV $\gamma$ -O-acetyl hexoside

ANOVA p-value: 0.40 (n.s.)

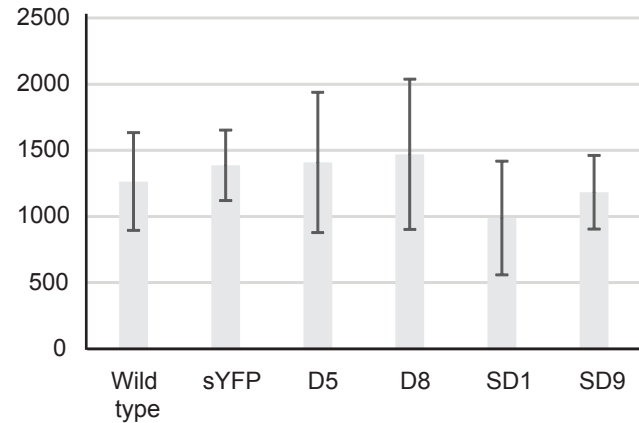

Supplement: PBI-15-581-s004.pdf [file PBI-15-581-s004.pdf]
