# Supplementary material for: Degradation of lignin β‐aryl ether units in Arabidopsis thaliana expressing LigD, LigF and LigG from Sphingomonas paucimobilis SYK‐6
Source: PubMed Central journal article supplement (PMC5399005; doi:10.1111/pbi.12655), 2016-11-29
Supplement: PBI-15-581-s008.pdf [file PBI-15-581-s008.pdf]

The chemical synthesis of MPHPV S4 [ $\alpha$ -(2-methoxyphenoxy)- $\beta$ -hydroxypropiovanillone (S4)] was accomplished from commercially available GGE S1 [(guaiacylglycerol- $\beta$ -guaiacyl ether (S1))] as shown in Figure 1A. The phenolic OH- and primary OH-groups of S1 were selectively protected with a tert-butyldiphenylsilyl group via silylation with tert-butyldiphenylchlorosilane using the DMAP-TEA method (Chaudhary and Hernandez, 1979) to give S2 in quantitative yield. Oxidation of the remaining free secondary OH-group of S2 with periodinane (Dess and Martin, 1991) afforded the ketone S3 in 90 % yield. Finally, removal of the tert-butyldiphenylsilyl groups with TBAF (tetrabutylammonium fluoride) in THF (Hanessian and Lavallee, 1975) afforded the desired product S4 in 85 % yield.

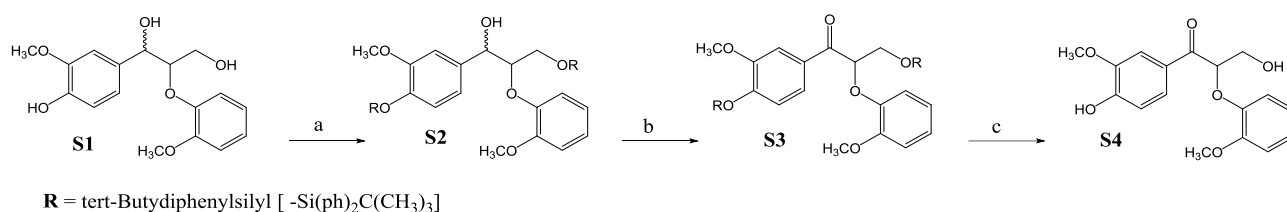

**Figure 1.** Chemical synthesis of MPHPV ( $\alpha$ -(2-methoxyphenoxy)- $\beta$ -hydroxypropiovanillone) from GGE. The reagents and reaction conditions used were: a) TEA, DMAP, TBDPSi-Cl,  $\text{CH}_2\text{Cl}_2$ , r.t., 1 h, 97 %; b) Dess–Martin periodinane, 90% ; c) TBAHF/THF, r.t. 1 h, 85 %.

The chemical synthesis of HPV-glucopyranoside S14 (3-( $\beta$ -D-glucopyranosyl)oxy-1-(4-hydroxy-3-methoxyphenyl)-propan-1-one (S14)) is outlined in Figure 2.

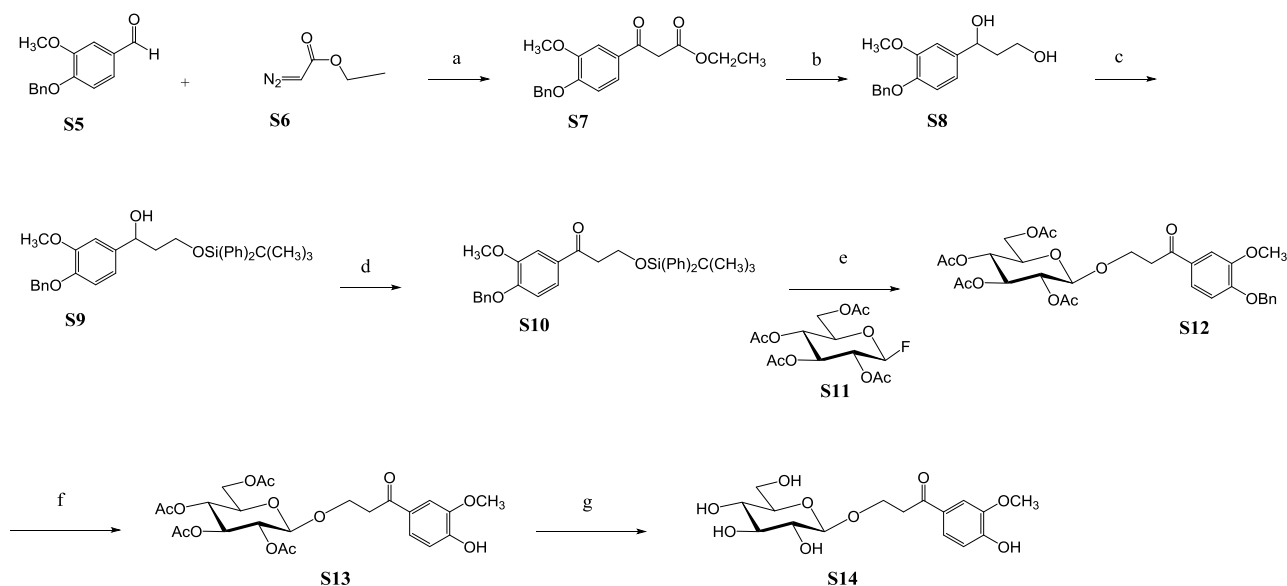

**Figure 2.** Chemical synthesis of HPV-glucopyranose from 4-benzyloxy-3-methoxybenzaldehyde

Compound nomenclature:

S5: 4-Benzyloxy-3-methoxybenzaldehyde; S6: Ethyl diazoacetate; S7: Ethyl 3-(4-benzyloxy-3-methoxyphenyl)-3-oxopentanoate; S8: 3-(4-Benzyloxy-3-methoxyphenyl)-3-hydroxypropan-1-ol;

**S9:** 1-(4-Benzyloxy-3-methoxyphenyl)-3-(*tert*-butyldiphenylsilyl)oxy-propan-1-ol;

**S10:** 1-(4-Benzyloxy-3-methoxyphenyl)-3-(*tert*-butyldiphenylsilyl)oxy-propan-1-one;

**S11:** 2,3,4,6-Tetra-*O*-acetyl- $\beta$ -D-glucopyranosyl fluoride; **S12:** 1-(4-Benzyloxy-3-methoxyphenyl)-3-(2,3,4,6-tetra-*O*-acetyl- $\beta$ -D-glucopyranosyl)oxy-propan-1-one;

**S13:** 3-(2,3,4,6-Tetra-*O*-acetyl- $\beta$ -D-glucopyranosyl)oxy-1-(4-hydroxy-3-methoxyphenyl)-propan-1-one;

**S14:** 3-( $\beta$ -D-glucopyranosyl)oxy-1-(4-hydroxy-3-methoxyphenyl)-propan-1-one (HPV-Glucoside);

The reagents and reaction conditions used were: a) 5 mol % NbCl<sub>5</sub>, CH<sub>2</sub>Cl<sub>2</sub>, r.t.; b) NaBH<sub>4</sub> (4 eq), MeOH, r.t.; c) TEA, DMAP, TBDPSi-Cl, CH<sub>2</sub>Cl<sub>2</sub>, r.t.; d) Dess–Martin periodinane, 90% ; e), BF<sub>3</sub>.Et<sub>2</sub>O, CH<sub>2</sub>Cl<sub>2</sub>, r.t., 1.5 h; f) AlCl<sub>3</sub>-PhNMe<sub>2</sub>, CH<sub>2</sub>Cl<sub>2</sub>, r.t.; g) NaOCH<sub>3</sub>-MeOH, MeOH, r.t., Dowex (H<sup>+</sup> Form).

In this synthesis, commercially available 4-benzyloxy-3-methoxybenzaldehyde (**S5**) was treated with ethyl diazoacetate (**S6**) in the presence of NbCl<sub>5</sub> as described for similar aldehydes (Yadav et al., 2005) to give the corresponding  $\beta$ -ketoester **S7** in 75 % yield. Chemical modification of **S7** via reduction (Chaudhuri et al., 2010), selective silylation (Chaudhary and Hernandez, 1979) and oxidation (Dess and Martin, 1991) afforded compound **S10**. The silylated derivative **S10** was subjected for glycosylation with glycosyl fluoride (**S11**) (Zagrobelyny et al., 2014) using borotrifluoroetherate as promoter (Kunz and Sager, 1985) to afford the protected glucoside **S12**. **S12** was debenzylated (Akiyama et al., 1992) to give **S13** from which the acetyl groups linked to the sugar moiety were removed using standard procedures afforded the target glucoside **S14**. The yield obtained in each of the deprotection steps was low and may be optimized. Structural verification of the synthesized compounds was carried out using electrospray ionisation mass spectrometry and <sup>1</sup>H, <sup>13</sup>C-NMR experiments.
